# Supplementary material for: Emerging Role of Oxidative Stress on EGFR and OGG1-BER Cross-Regulation: Implications in Thyroid Physiopathology
Source: MDPI journal article supplement (doi:10.3390/cells11050822), 2022-02-26
Supplement: s1 [file s1]

# Supplementary Data

Table S1: Details of primers for each evaluated gene by qRT-PCR and gene dosage assay.

| Primers for gene expression assay |                         |                          |                               |
|-----------------------------------|-------------------------|--------------------------|-------------------------------|
| Genes                             | Forward (5'→3')         | Reverse (5'→3')          | RefSeq mRNA Sequence          |
| <i>APE1</i>                       | ACTTCAGGAGCTGCCTGGACT   | AATCACCCGGCCTTCCTGATCA   | <a href="#">NM_001244249</a>  |
| <i>CXCL8</i>                      | ATGACTTCCAAGCTGGCCGT    | TCCTTGGCAAACTGCACCT      | <a href="#">NM_000584.4</a>   |
| <i>EGFR</i>                       | CCTGACTCCGTCCAGTCTTG    | GCTTGTTACTCGTGCCTTG      | <a href="#">NM_005228</a>     |
| <i>ErbB2</i>                      | TCACCTACAACACAGACACG    | GACAGGCAGTCACACAGC       | <a href="#">NM_001005862</a>  |
| <i>ErbB3</i>                      | AGATGCTGAGATAGTGGTGAAG  | ATGGTCTTGGTCAATGTCTGC    | <a href="#">NM_001982</a>     |
| <i>ErbB4</i>                      | CAGATGCTACGGACCTTACG    | CATTGAAATGTGCTCCAGTTG    | <a href="#">NM_005235</a>     |
| <i>GUSB*</i>                      | AGCCAGTTCTCATCAATGG     | GGTAGTGGCTGGTACGGAA      | <a href="#">NM_000181</a>     |
| <i>HO1</i>                        | CCCAGGCAGAGAATGCTGAGTTC | AGCCTTGCGGTGCAGCTCTTC    | <a href="#">NM_002133</a>     |
| <i>JUN/AP1</i>                    | TCGACATGGAGTCCCAGGA     | GGCGATTCTCTCCAGCTTCC     | <a href="#">NM_002228</a>     |
| <i>MUTYH</i>                      | TCGTCTCCCGCTGAGTCGT     | CAGAAGGCTTTGGCCTGACT     | <a href="#">NM_001048171</a>  |
| <i>NRF2</i>                       | TTCAGCCAGCCAGCACATC     | CGTAGCCCGAAGAACTCATTGTC  | <a href="#">NM_001313902</a>  |
| <i>OGG1</i>                       | TGGACCTGGTTCTGCCTTCT    | TAGCCTGGCTCTTGTCTCCT     | <a href="#">NM_016821</a>     |
| <i>PPARG</i>                      | ACTATGGAGTTCATGCTTGTGA  | CCGACAGTACTGACATTTATTTTC | <a href="#">NM_001354666</a>  |
| <i>TPO</i>                        | TCTCATTGGGAAGCAGATGAAG  | TCTGTGCATCCGTGAAGACGT    | <a href="#">NM_000547</a>     |
| <i>ZEB1</i>                       | CGCAGTCTGGGTGTAATCGTA   | CGTTTCTTGCAGTTTGGGCATT   | <a href="#">NM_001128128i</a> |
| Primers for gene dosage assay     |                         |                          |                               |
| Genes                             | Forward (5'→3')         | Reverse (5'→3')          | RefSeq DNA sequence           |
| <i>B-actin*</i>                   | TACCACTGGCATCGTGATGG    | CGGTGAGGATCTTCATCAGG     | <a href="#">NC_000007.14</a>  |
| <i>MUTYH</i>                      |                         |                          | <a href="#">NC_000001.11</a>  |
| Amplicon 1                        | GAAGCTGCGGGAGCTGAAA     | ATCCCCGACTGCCTGAACC      |                               |
| Amplicon 2                        | AGCCCTCTTGGCTTGAGTA     | TGCCGATTCCCTCCATTCT      |                               |
| <i>OGG1</i>                       |                         |                          | <a href="#">NC_000003.12</a>  |
| Amplicon 1                        | TCTTTGGGCGTCGACGAGG     | GAGGGGACAGGCTTCTCAG      |                               |
| Amplicon 2                        | TGTTTCAGTGCCGACCTGCGCC  | TTTGAACCTTTCTGCGCT       |                               |

\* Housekeeping gene.

Analyzed genes: *APE1*, Apurinic/apyrimidinic Endodeoxyribonuclease 1; *EGFR*, Epidermal Growth Factor Receptor; *ErbB2*, Erb-b2 receptor tyrosine kinase 2; *ErbB3*, Erb-b3 receptor tyrosine kinase 3; *ErbB4*, Erb-b4 receptor tyrosine kinase 4; *GUSB*, Glucuronidase Beta; *HO-1*, Heme Oxygenase 1; *JUN/AP1*, Jun proto-oncogene, AP-1 transcription factor subunit; *MUTYH*, MutY DNA glycosylase; *NRF2*, Nuclear Factor, erythroid 2 like 2; *OGG1*, 8-Oxoguanine Glycosylase; *PPARG*, Peroxisome Proliferator Activated Receptor Gamma; *TPO*, Thyroperoxidase; *ZEB1*, Zinc finger E-box Binding homeobox 1.



**Figure S1. FACS analysis for FITC-Annexin-V-based apoptosis detection.** Untreated Starved NTHY cells. Quiescent NTHY cells treated with H<sub>2</sub>O<sub>2</sub> for 15'; Quiescent NTHY cells treated with H<sub>2</sub>O<sub>2</sub> for 30'; Untreated Starved TPC1 cells; Quiescent TPC1 cells treated with H<sub>2</sub>O<sub>2</sub> for 15'; Quiescent TPC1 cells treated with H<sub>2</sub>O<sub>2</sub> for 30'.

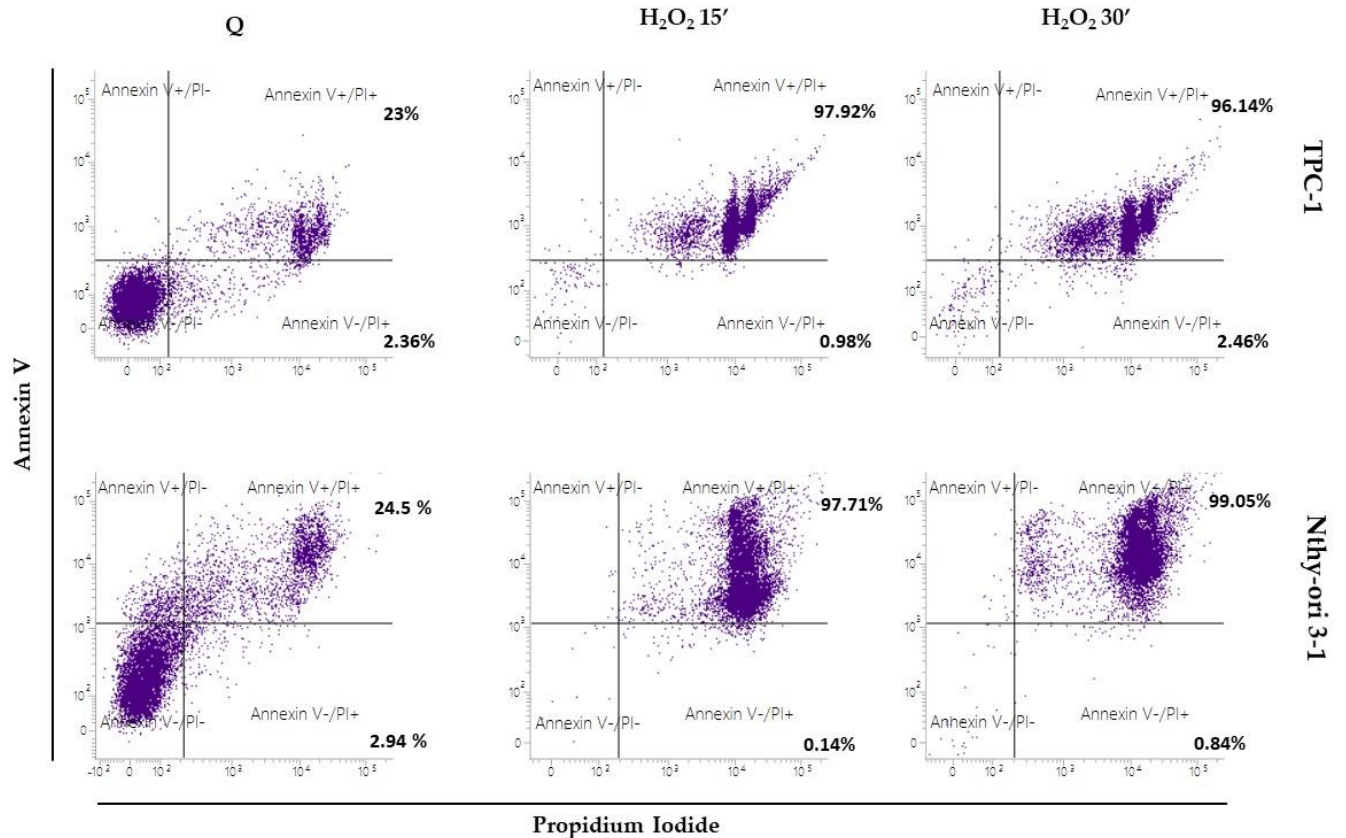

Cell death was assessed on Nthy-ori-3-1 and TPC-1 starvate cells after acute exposure to 10mM H<sub>2</sub>O<sub>2</sub> for 15 and 30 minutes. Annexin V (Becton Dickinson Biosciences, San Jose, CA, USA) was used to detect phosphatidylserine presence on cell membranes, in order to discriminate apoptotic cells and counterstained by Propidium Iodide. Each sample ( $5 \times 10^5$  cells) was treated according to the manufacturer's instructions. After staining procedures, samples were analyzed by flow cytometry using a FACSVerse cytometer (Becton Dickinson Biosciences). Finally, data were analyzed using FACSuite v 1.0.6.5230 (Becton Dickinson Biosciences) .. The results were interpreted in the following fashion: cells in the lower-left quadrant (Annexin-V-/PI-) represent living cells; those in the upper-left quadrant (Annexin-V+/PI-) represent early apoptotic cells; those in the upper-right quadrant (Annexin-V+/PI+) represent late apoptotic/death cells. Three independent experiments were performed with three biological replicates per condition each with two technical replicates. The relative number of apoptotic/death cells as significantly ( $p < 0.001$ ) increased in both cell lines after acute H<sub>2</sub>O<sub>2</sub> tratment at 15 and 30 minutes..
